# Supplementary material for: Crystal graph convolution neural networks for fast and accurate prediction of adsorption ability of Nb2CTx towards Pb(ii) and Cd(ii) ions
Source: Royal Society of Chemistry journal article supplement (doi:10.1039/d3ta00019b), 2023-01-01
Supplement: d3ta00019b1.pdf [file d3ta00019b1.pdf]

Supplementary information

**Crystal graph convolution neural networks for fast  
and accurate prediction of adsorption ability of  
Nb<sub>2</sub>CT<sub>x</sub> towards Pb(II) and Cd(II) ions**

Zeeshan Haider Jaffari <sup>a</sup>, Ather Abbas <sup>a</sup>, Muhammed Umer <sup>b</sup>, Eun-Sik Kim <sup>c, \*</sup>, Kyung Hwa  
Cho <sup>a,d, \*</sup>

<sup>a</sup> School of Urban and Environmental Engineering, Ulsan National Institute of Science and  
Technology (UNIST), UNIST-gil 50, Ulsan 44919, Republic of Korea

<sup>b</sup> Center for Superfunctional Materials, Department of Chemistry, Ulsan National Institute of  
Science and Technology (UNIST), UNIST-gil 50, Ulsan 44919, Republic of Korea

<sup>c</sup> Department of Environmental System Engineering, Chonnam National University, Daehak-  
ro 50, Yeosu 59626, Republic of Korea

<sup>d</sup> Graduate School of Carbon Neutrality, Ulsan National Institute of Science and Technology  
(UNIST), UNIST-gil 50, Ulsan 44919, Republic of Korea

\* Corresponding authors: [eskim@jnu.ac.kr](mailto:eskim@jnu.ac.kr) (E.-S. Kim), [khcho@unist.ac.kr](mailto:khcho@unist.ac.kr) (K. H. Cho):

These co-corresponding authors contributed equally to this work.

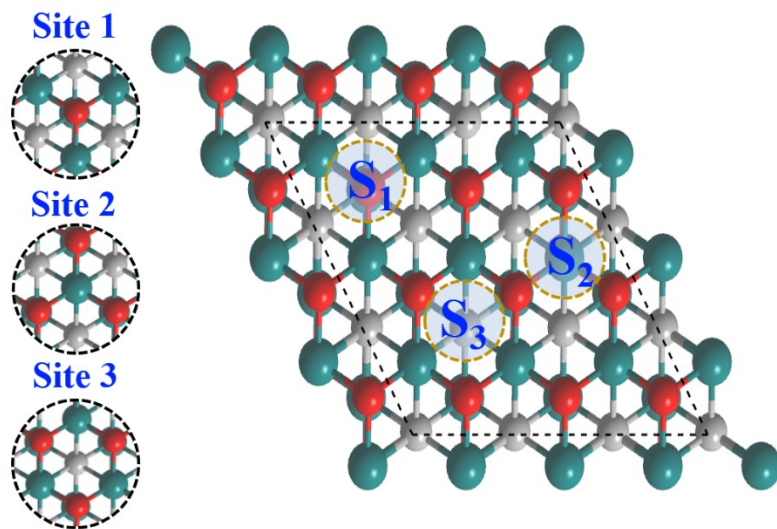

**Fig. S1.** Top view of the optimized crystal structure of Nb<sub>2</sub>CT<sub>x</sub> with 3 × 3 × 1 supercell. (S1–S3) represent the possible adsorption sites for heavy metal ions.

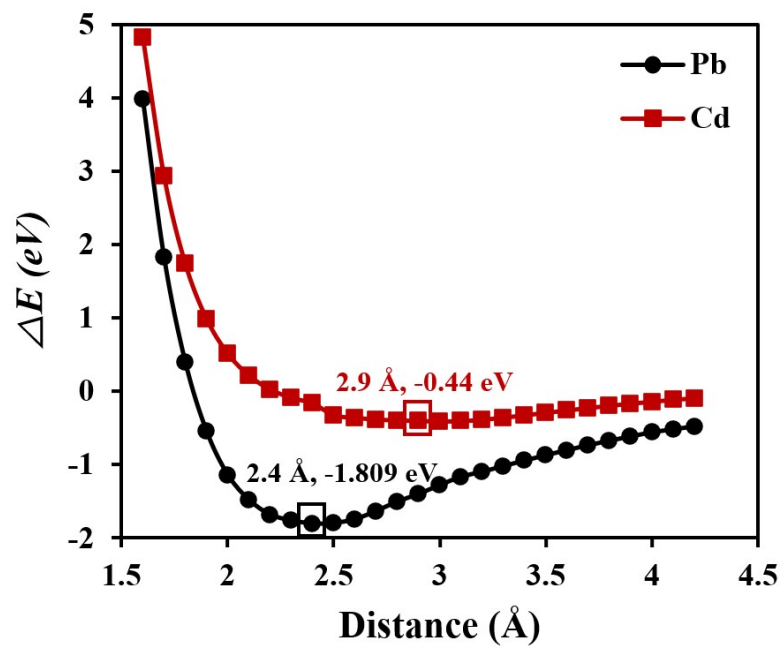

**Fig. S2.** Plot of DFT calculated lowest binding energy values at different distances for Pb(II) and Cd(II) ions on  $\text{Nb}_2\text{CT}_x$  surface.

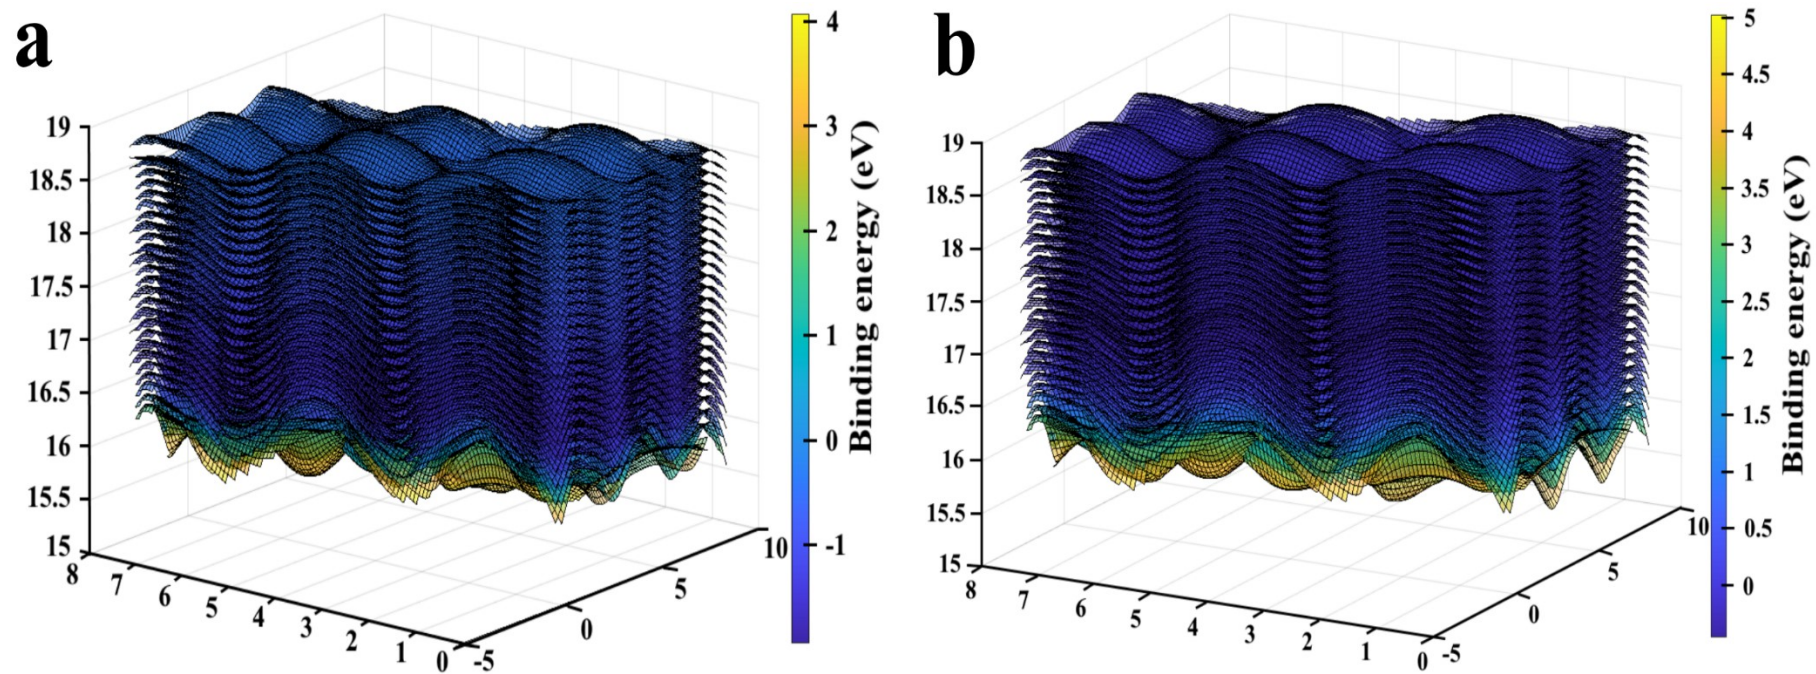

**Fig. S3.** Predicted binding energy surfaces at different distances from the surface of  $\text{Nb}_2\text{CT}_x$  for (a)  $\text{Pb(II)}$  ions and (b)  $\text{Cd(II)}$  ions.

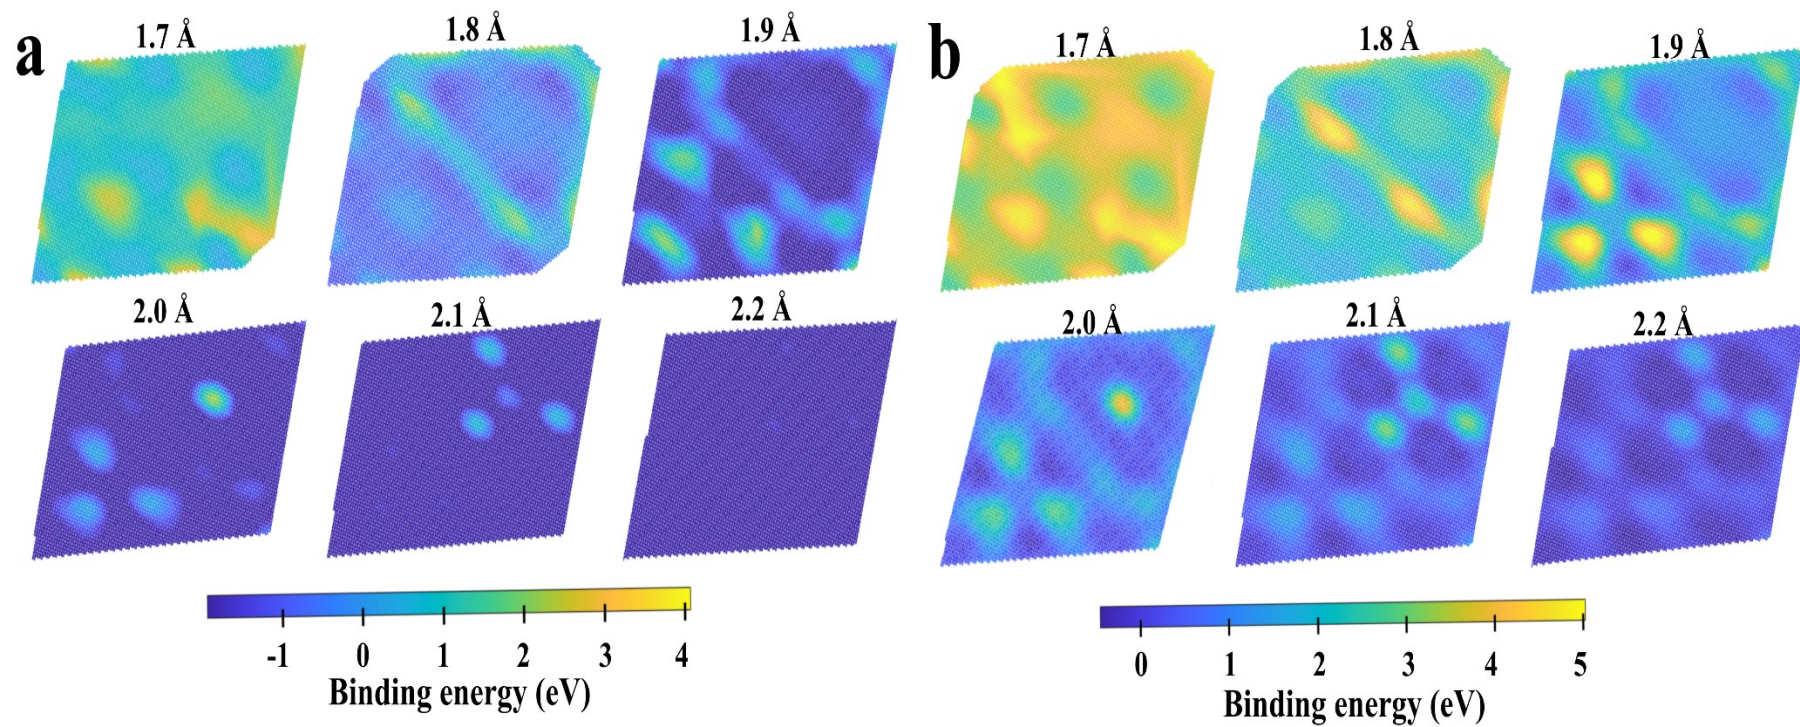

**Fig. S4.** Top views of the predicted adsorption energy surfaces at different distances from Nb<sub>2</sub>CT<sub>x</sub> structure for (a) Pb(II) ions and (b) Cd(II) ions.

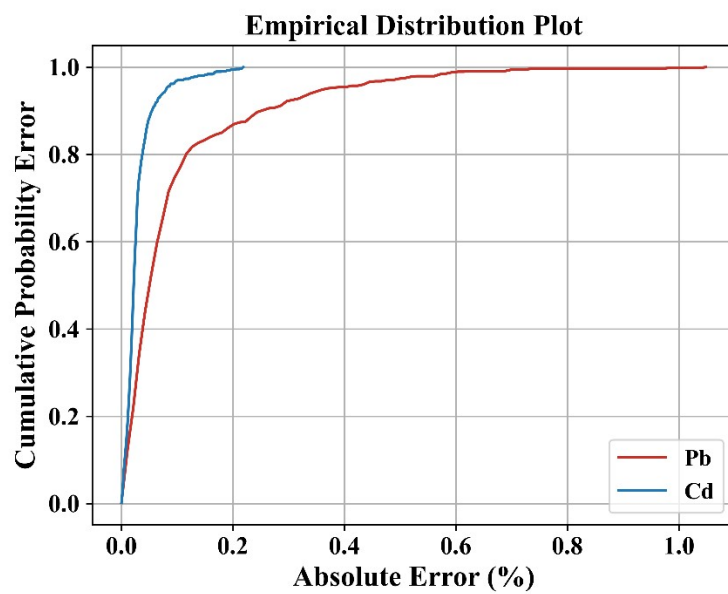

**Fig. S5.** EDP plot for binding energies of the CGCNN model.

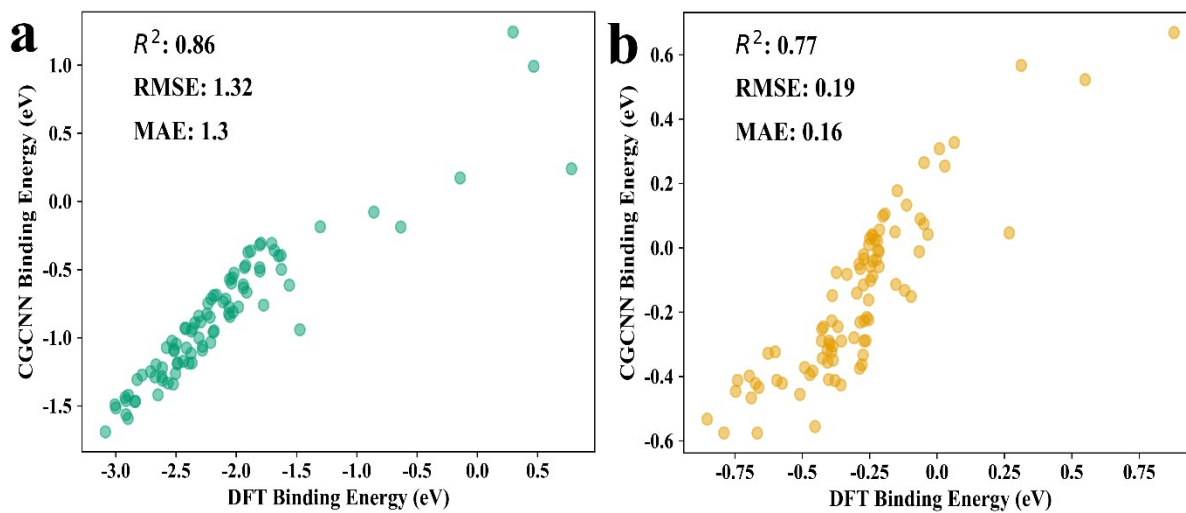

**Fig. S6.** Comparison between DFT calculated and CGCNN predicted adsorption energies for surface-defected Nb<sub>2</sub>CT<sub>x</sub> (a) Pb(II) and (b) Cd(II) ions.

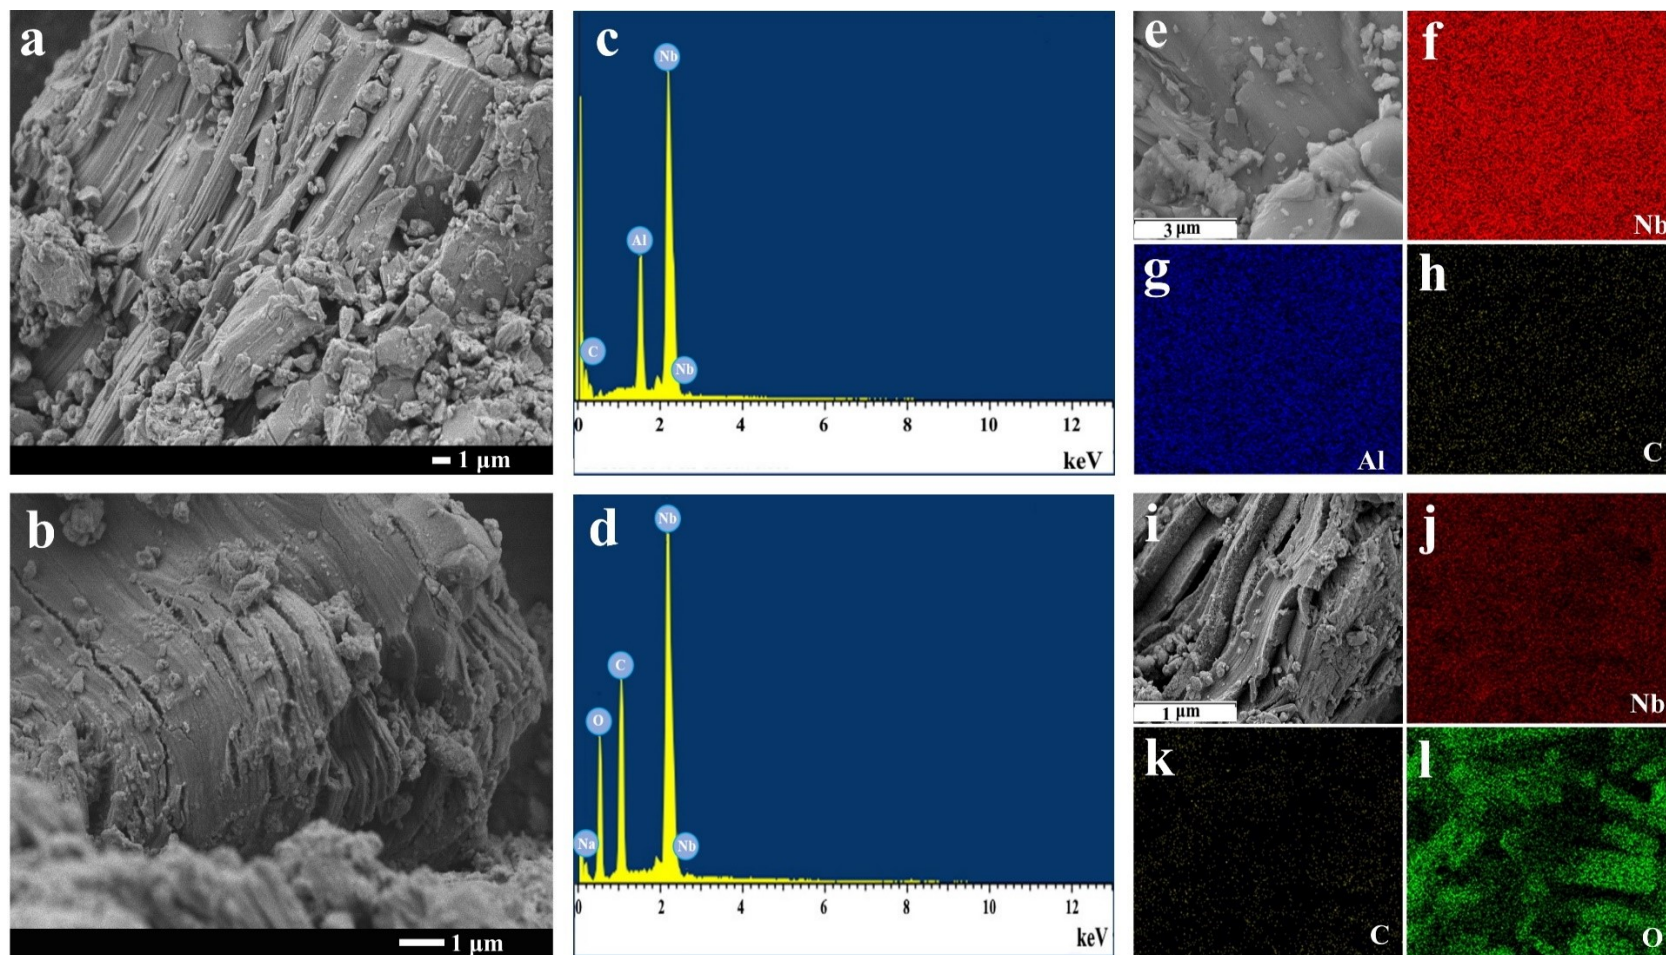

**Fig. S7.** FESEM analysis of (a)  $\text{Nb}_2\text{AlC}$ , (b)  $\text{Nb}_2\text{CT}_x$  samples, EDX analysis of (c)  $\text{Nb}_2\text{AlC}$  and (d)  $\text{Nb}_2\text{CT}_x$  samples, EDX elemental mapping of  $\text{Nb}_2\text{AlC}$  (e) SEM image of selected region, (f) Nb, (g) Al, (h) C element, and EDX elemental mapping of  $\text{Nb}_2\text{CT}_x$  (i) SEM image of selected region (j) Nb, (k) C and (l) O element.



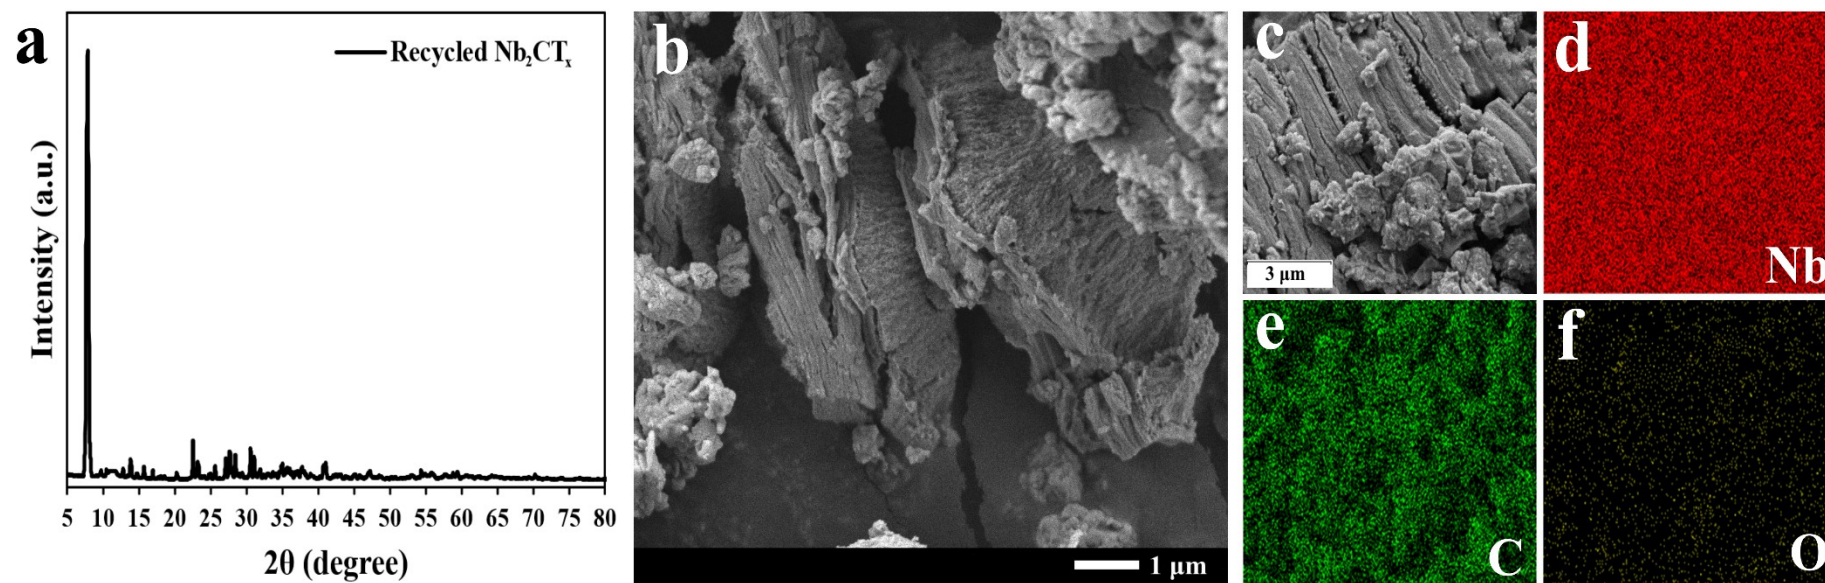

**Fig. S8.** (a) XRD patterns of the recycled Nb<sub>2</sub>CT<sub>x</sub> and (b) FESEM image of recycled Nb<sub>2</sub>CT<sub>x</sub>, EDX mapping of recycled Nb<sub>2</sub>CT<sub>x</sub> (c) SEM image of selected region (d) Nb, (e) C and (f) O element.

**Table S1:** Hyperparameters of the CGCNN model

| Hyperparameters                                          | Ranges                           |
|----------------------------------------------------------|----------------------------------|
| epochs                                                   | 100                              |
| Batch size                                               | 16                               |
| Learning rate                                            | 0.001                            |
| Number of hidden atom features in the convolution layers | 64                               |
| Number of convolution layers                             | 3                                |
| Number of hidden features after pooling                  | 1                                |
| Regularization term $\lambda^a$                          | $e^{-6}, e^{-4}, e^{-2}, e^{-0}$ |

a L2 regularization term  $\lambda \|W\|_2^2$  is inserted to cost function to decline the overfitting.
